# Supplementary material for: New directions for hydrogen storage: sulphur destabilised sodium aluminium hydride
Source: Royal Society of Chemistry journal article supplement (doi:10.1039/c3ta12429k), 2013-01-01
Supplement: c3ta12429k.pdf [file c3ta12429k.pdf]

## New Directions for Hydrogen Storage: Sulphur Destabilized Sodium Aluminium Hydride

Drew A. Sheppard, Lars H. Jepsen, Torben R. Jensen, Mark Paskevicius and Craig E. Buckley

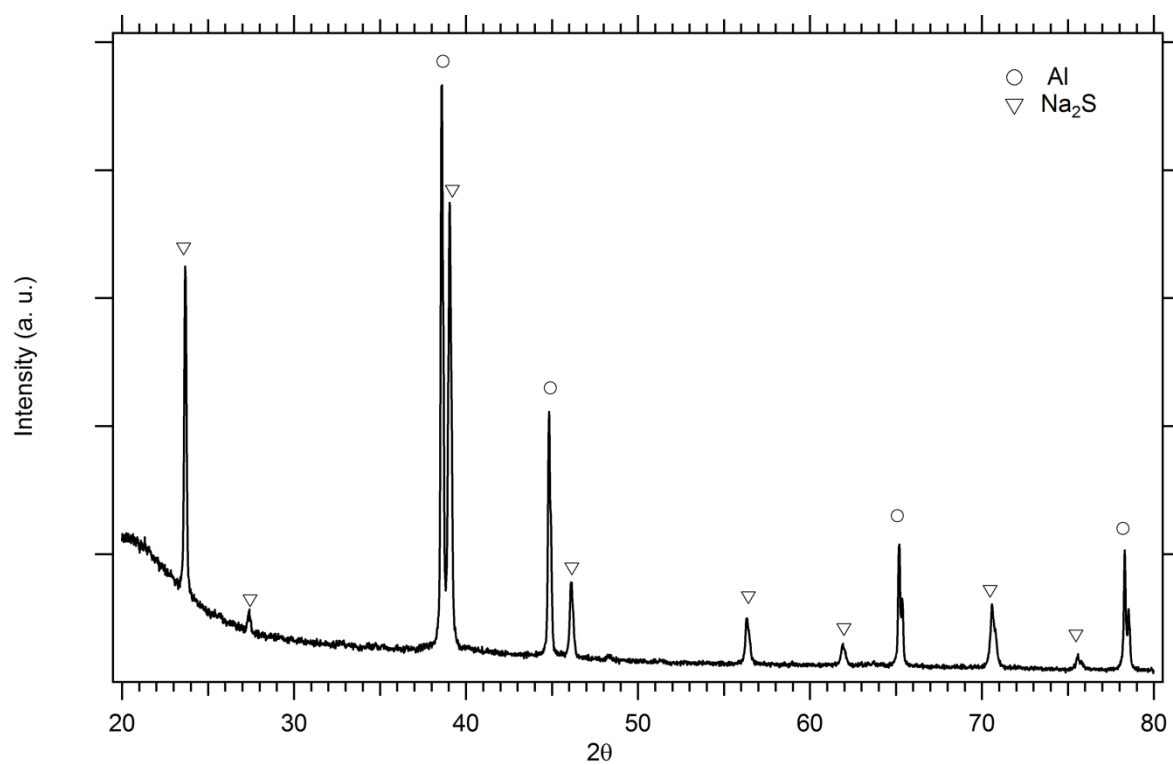

Figure S1. Laboratory XRD ( $\lambda = 1.5406 \text{ \AA}$ ) of NaAlH<sub>4</sub>-Al<sub>2</sub>S<sub>3</sub> after desorption at 375 °C, measured on a Bruker D8 instrument.

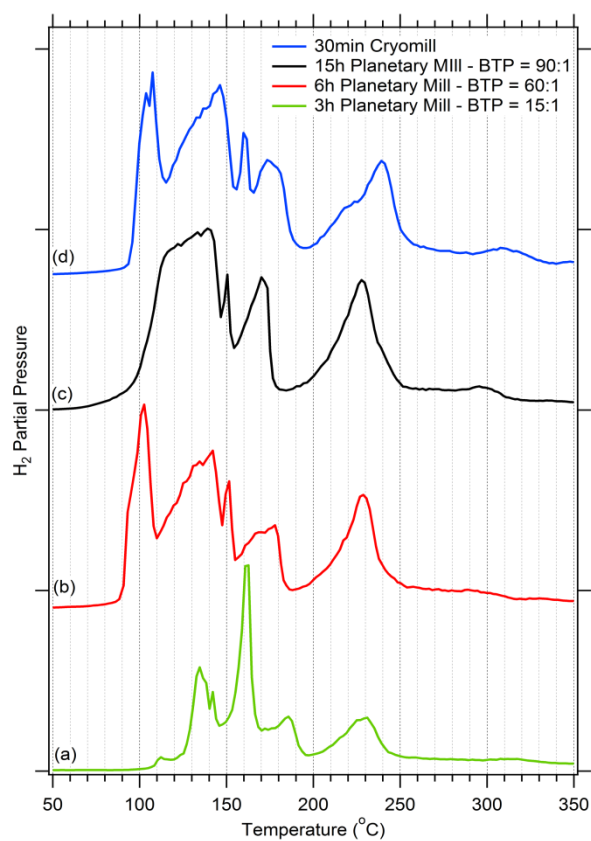

Figure S2. Temperature Programmed Desorption of  $\text{NaAlH}_4$  - $\text{Al}_2\text{S}_3$  after ball-milling for (a) 3 h at a BTP = 15:1, (b) 6 h at a BTP = 60:1, (c) 15 h at a BTP = 90:1, and (d) 30 minute cryomilling. Heating rate =  $1^\circ\text{C}/\text{min}$ .

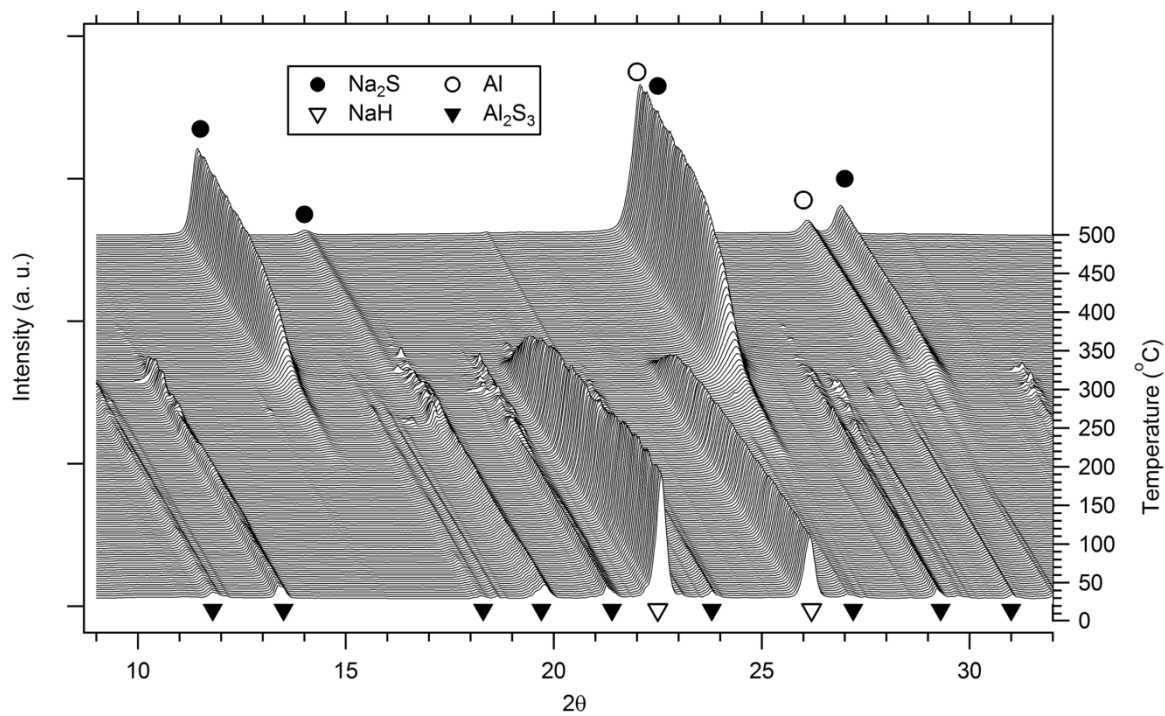

Figure S3. *In-situ* SR-XRD ( $\lambda = 1.10113 \text{ \AA}$ ) of  $\text{NaH-Al}_2\text{S}_3$  desorbed under vacuum at a heating rate of  $5^\circ\text{C}/\text{min}$ .

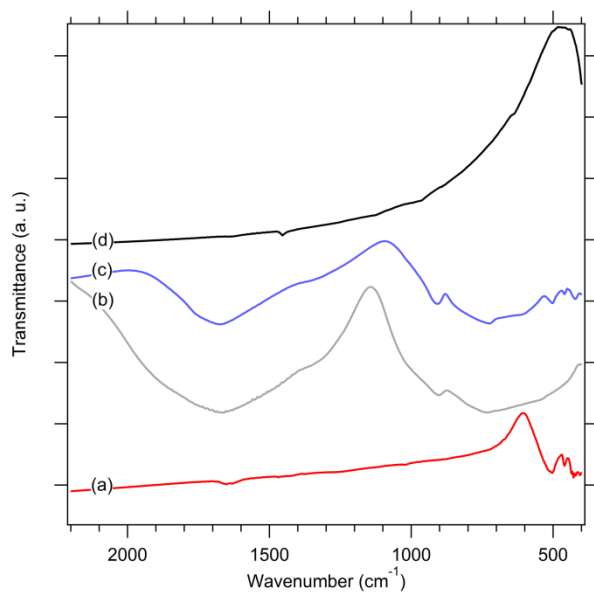

Figure S4. Fourier Transform Infra-Red spectroscopy pattern of (a) pure Al<sub>2</sub>S<sub>3</sub>, (b) pure NaAlH<sub>4</sub>, (c) NaAlH<sub>4</sub>-Al<sub>2</sub>S<sub>3</sub> after ball-milling for 6 h and (d) pure Na<sub>2</sub>S.

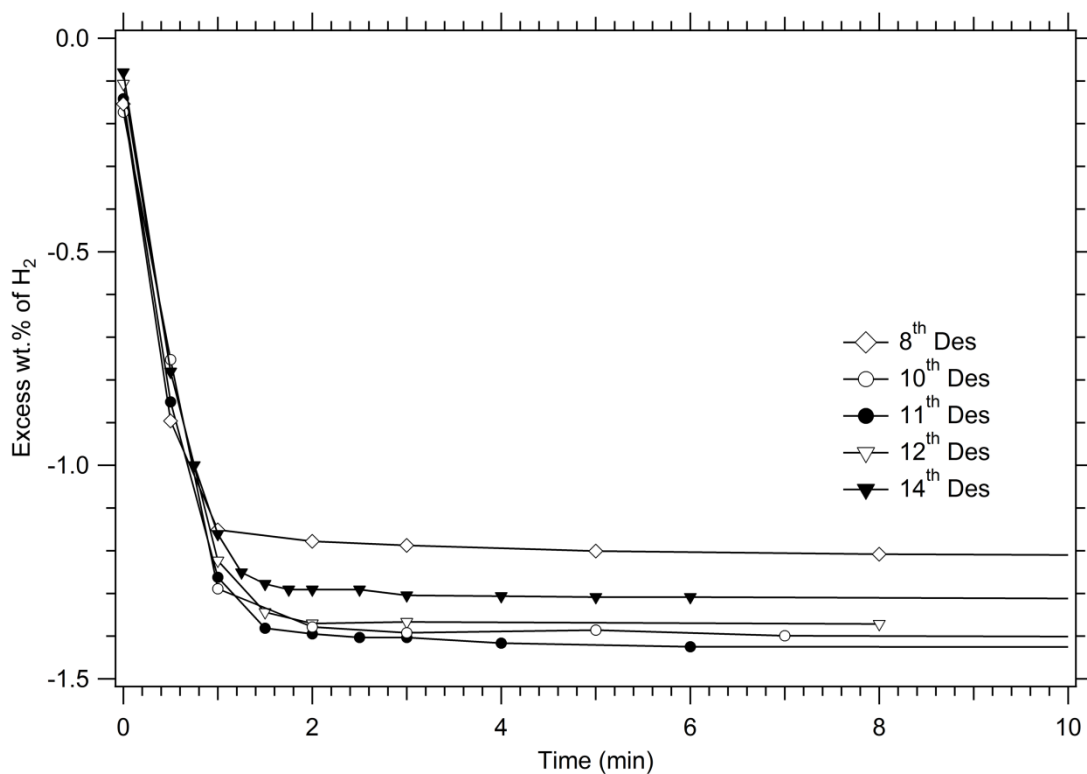

Figure S5. H<sub>2</sub> desorption from NaAlH<sub>4</sub>-Al<sub>2</sub>S<sub>3</sub> over multiple cycles at 300 °C. Desorption was performed against a H<sub>2</sub> back-pressure of between 63 and 76 bar.

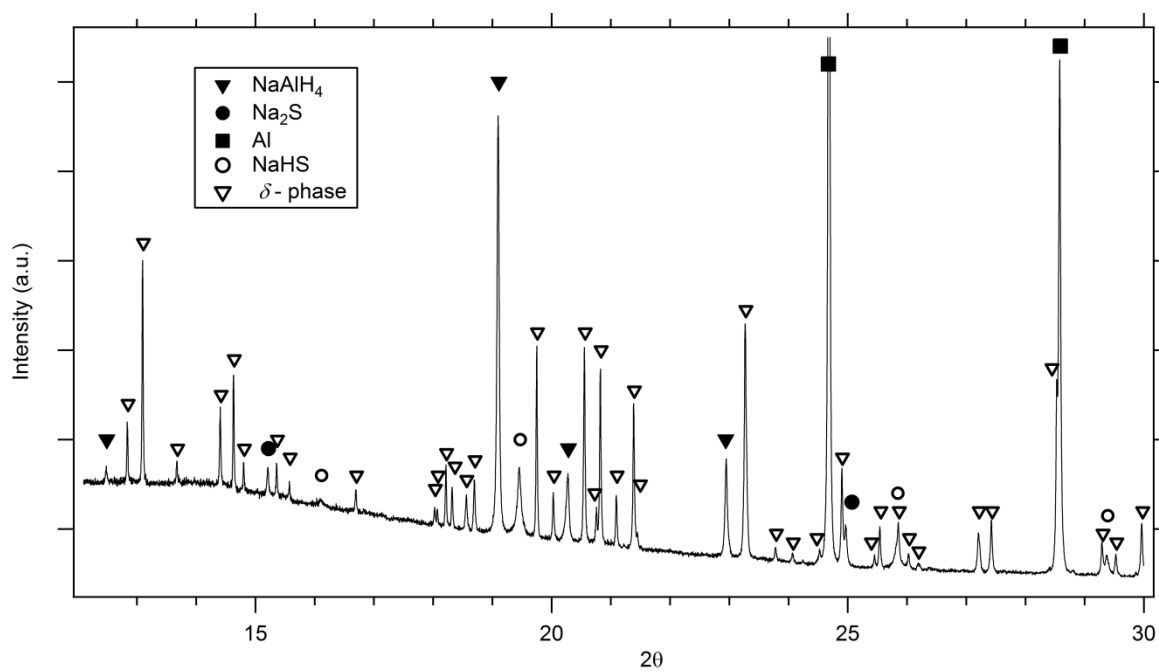

Figure S6. *Ex-situ* SR-XRD of  $\text{NaAlH}_4\text{-Al}_2\text{S}_3$  decomposed under vacuum at 375 °C followed by hydrogenation at 300 °C under 282 bar  $\text{H}_2$  pressure.
